# Supplementary material for: Evaluation of the ECOSSE-Model for Estimating Soil Respiration from Eight European Permanent Grassland Sites
Source: Preprints.org preprint supplement (doi:10.20944/preprints202305.0320.v1), 2023-05-05
Supplement: Supplementary file 3 [file supplementary]

**Supplementary materials: Testing and validating the ECOSSE-model for estimating soil respiration from eight European permanent grassland sites**

Fig. S1: Average daily air temperature (oC; black line) and precipitation (mm; blue line) at the experimental sites during the measurements of net ecosystem respiration


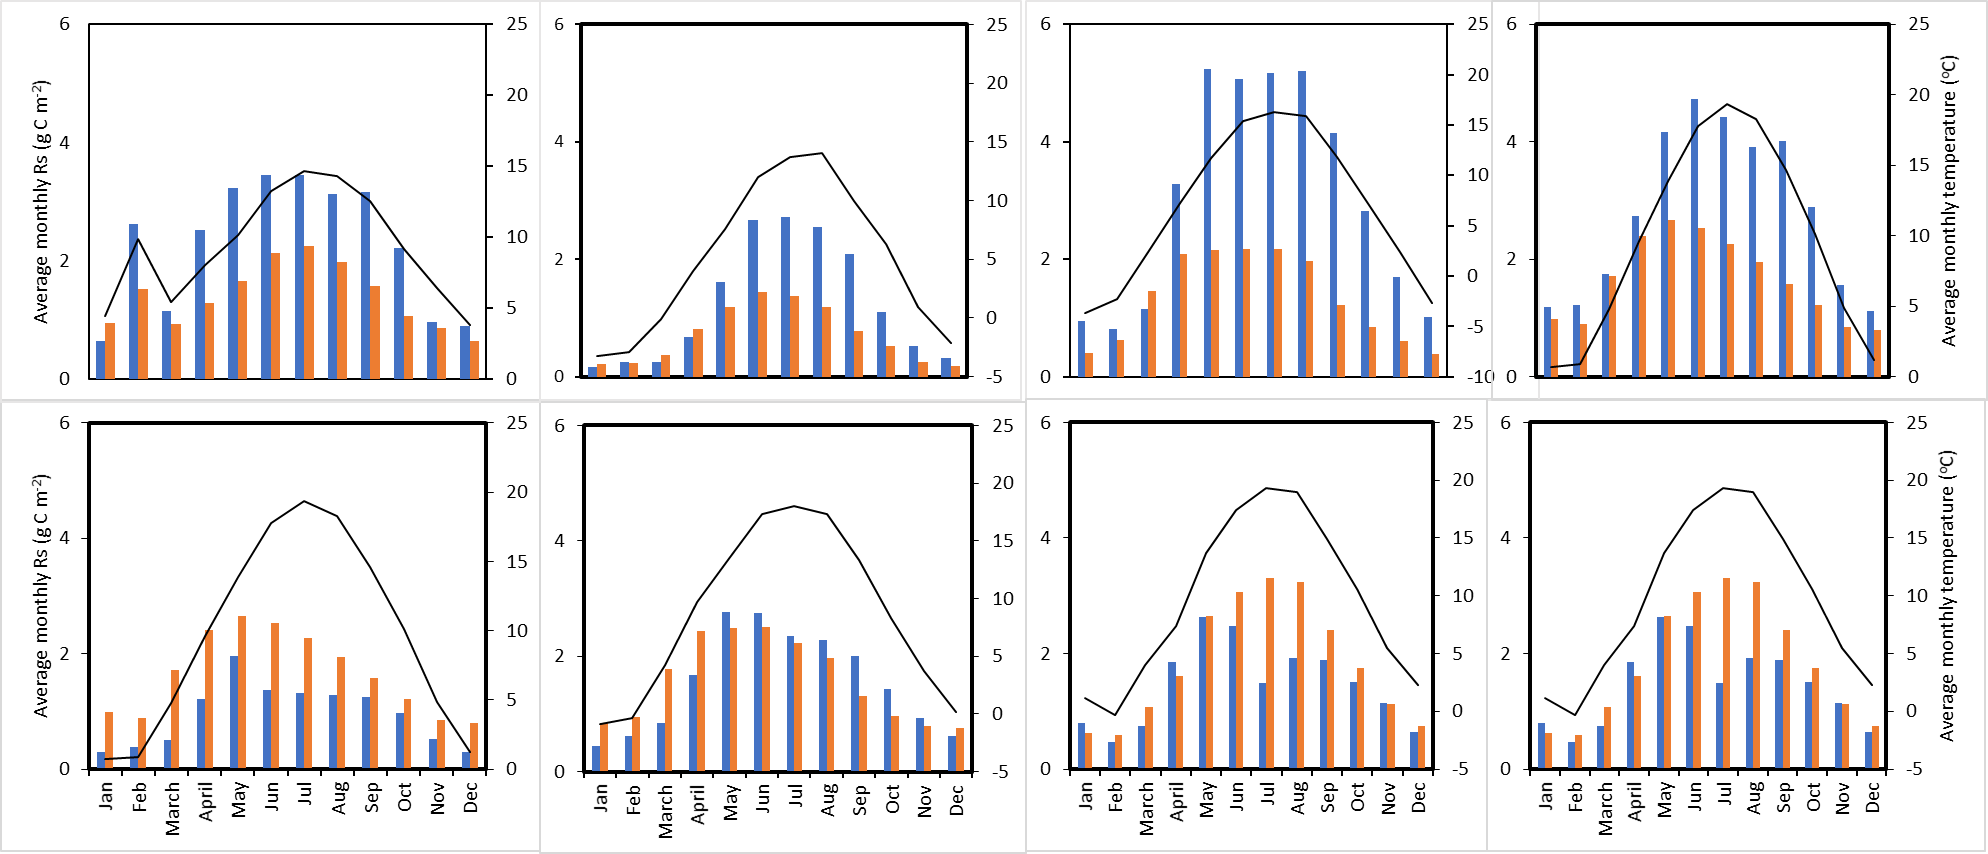


Easter Bush

Alp Weissenstein

Neustift

Chamau

Matra

Grünschwaige

Bovora

Amperlo

Fig. S2: Relationships between estimated (blue bar) and simulated (orange bar) monthly cumulative soil respiration (Rs) and average monthly air temperature (black line) at the investigated sites.
